# Supplementary material for: Early signs of multi-walled carbon nanotbues degradation in macrophages, via an intracellular pH-dependent biological mechanism; importance of length and functionalization
Source: PubMed Central journal article supplement (PMC5122009; doi:10.1186/s12989-016-0175-z), 2016-11-24

**Figure S3**

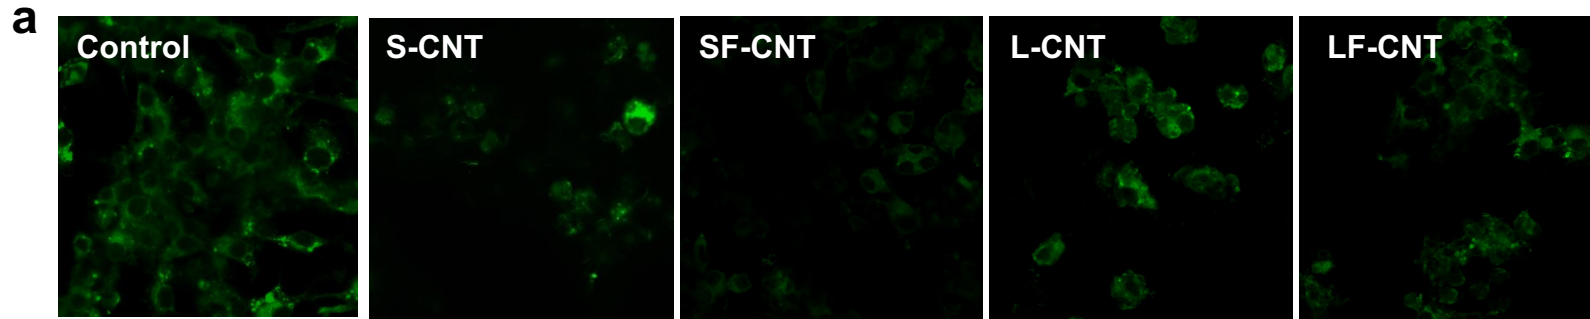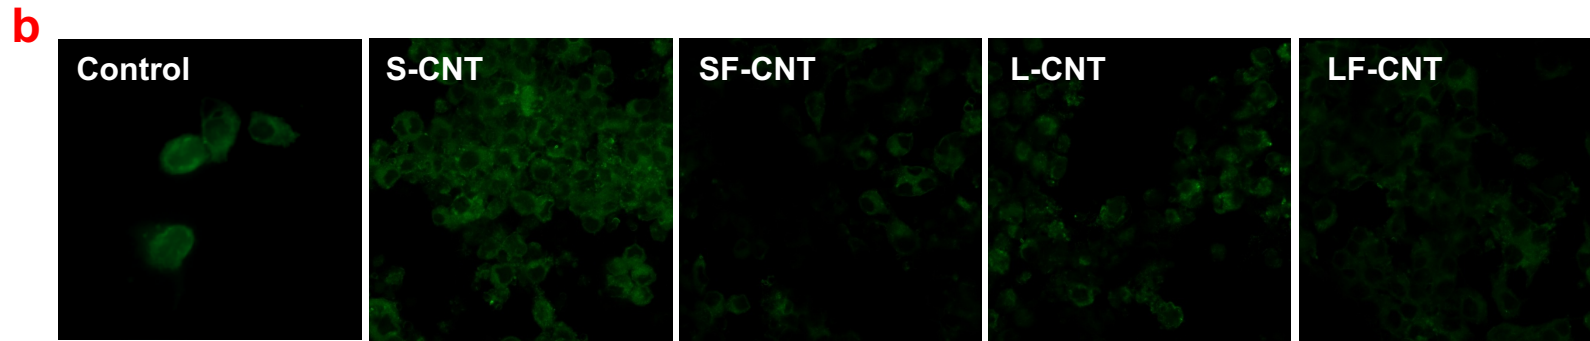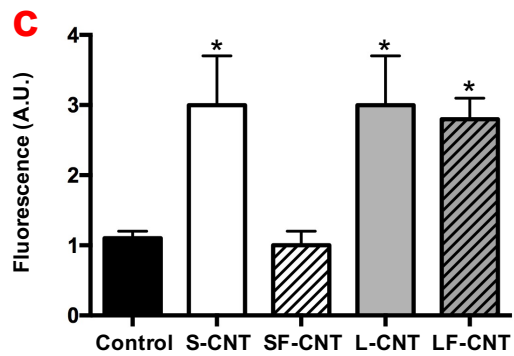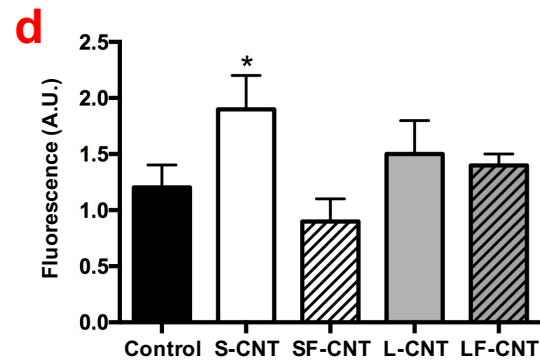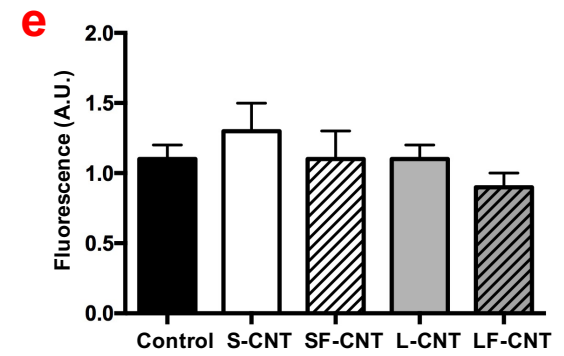

Supplement: 12989_2016_175_MOESM3_ESM.pdf [file 12989_2016_175_MOESM3_ESM.pdf]
