# Supplementary material for: Early signs of multi-walled carbon nanotbues degradation in macrophages, via an intracellular pH-dependent biological mechanism; importance of length and functionalization
Source: Springer Nature journal article supplement (doi:10.1186/s12989-016-0175-z), 2016-11-23

Figure S1

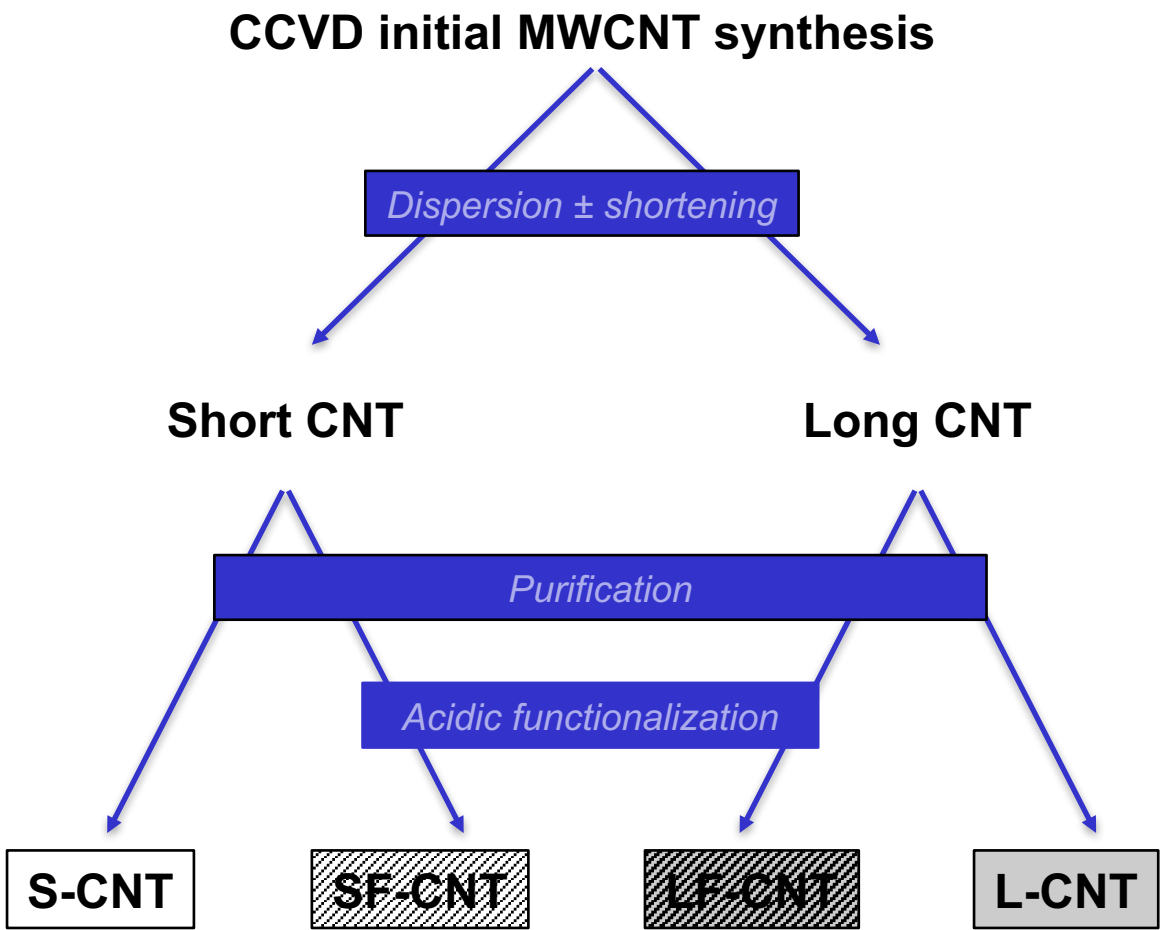

Supplement: MOESM1 [file 12989_2016_175_MOESM1_ESM.pdf]
